# Supplementary material
Source: PubMed Central journal article supplement (PMC2695095)
Supplement: 0805057106_0805057106SI.pdf [file 0805057106_0805057106SI.pdf]

# Supporting Information

Larrea et al. 10.1073/pnas.0805057106

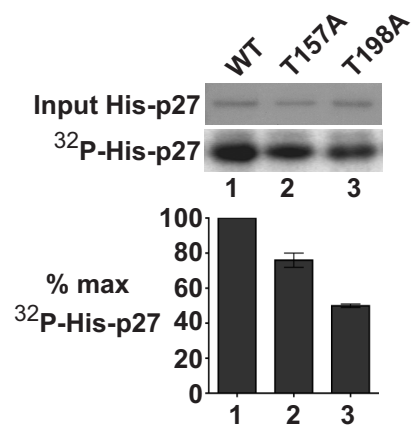

**Fig. S1.** Recombinant WT and mutant His-p27 proteins were reacted with RSK1 kinase in the presence of  $[\gamma\text{-}^{32}\text{P}]\text{ATP}$ . Coomassie stain of the input p27 and radioactivity in His-p27 bands are shown. Kinase activity (mean of 4 experiments  $\pm$  SEM) is graphed as % maximum (% max), using radioactivity in His-p27WT as 100% maximum kinase activity.

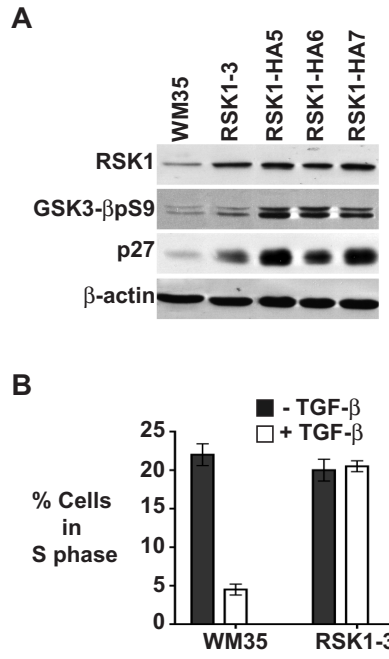

**Fig. S2.** RSK1 overexpression confers TGF- $\beta$  resistance. WM35 cells were transfected with WT-RSK1 or HA-RSK1. (A) RSK1-transfectants show increased RSK1, GSK3- $\beta$  phosphorylation (GSK3- $\beta$ pS9), and increased p27. (B) Flow cytometric analysis of WM35 and RSK1-3 clone treated with ( $\square$ ) or without ( $\blacksquare$ ) TGF- $\beta$  for 48 h. Graph shows % cells in S phase  $\pm$  SEM.

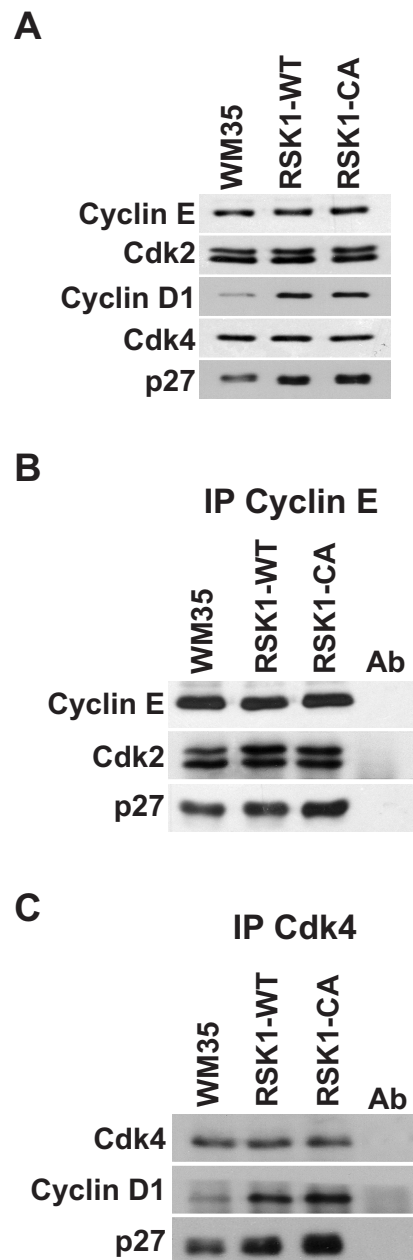

**Fig. S3.** RSK1 increases p27-cyclin D-Cdk4 complexes. WM35 cells were infected with pBabe RSK1-WT or RSK1-CA. (A) Levels of cyclin E, Cdk2, cyclin D1, Cdk4, and p27 in proliferating cells were analyzed by Western blotting. (B and C) Cyclin E (B) and Cdk4 (C) immunoprecipitates were resolved and associated proteins were analyzed by blotting. Ab indicates antibody-only control.
